# Supplementary material for: Biosynthesis of Hesperetin, Homoeriodictyol, and Homohesperetin in a Transcriptomics-Driven Engineered Strain of Streptomyces albidoflavus
Source: MDPI journal article supplement (doi:10.3390/ijms25074053), 2024-04-05
Supplement: s1 [file s1]

# Biosynthesis of Hesperetin, Homoeriodictyol and Homohesperetin in a Transcriptomics-driven Engineered Strain of *Streptomyces albidoflavus*

Álvaro Pérez-Valero<sup>1,2,3</sup>, Juan Serna-Diestro<sup>1,2,3</sup>, Albert E. Tafur Rangel<sup>4,5</sup>, Simona Barbuto Ferraiuolo<sup>6</sup>, Chiara Schiraldi<sup>6</sup>, Eduard J. Kerkhoven<sup>4,5,7</sup>, Claudio J. Villar<sup>1,2,3</sup>, Felipe Lombó<sup>1,2,3</sup> \*

<sup>1</sup> Research Group BIONUC (Biotechnology of Nutraceuticals and Bioactive Compounds), Departamento de Biología Funcional, Área de Microbiología, Universidad de Oviedo, Oviedo, Principality of Asturias, Spain

<sup>2</sup> IUOPA (Instituto Universitario de Oncología del Principado de Asturias), Principality of Asturias, Spain.

<sup>3</sup> ISPA (Instituto de Investigación Sanitaria del Principado de Asturias), Principality of Asturias, Spain.

<sup>4</sup> Department of Biology and Biological Engineering, Chalmers University of Technology, SE-412 96 Gothenburg, Sweden.

<sup>5</sup> Novo Nordisk Foundation Center for Biosustainability, Technical University of Denmark, DK-2800 Kgs. Lyngby, Denmark.

<sup>6</sup> Department of Experimental Medicine, Section of Biotechnology and Molecular Biology, University of Campania "Luigi Vanvitelli", Via De Crecchio 7, 80138, Naples, Italy.

<sup>7</sup> SciLifeLab, Chalmers University of Technology, SE-412 96 Gothenburg, Sweden.

\* Correspondence: lombofelipe@uniovi.es

Supplementary Materials:

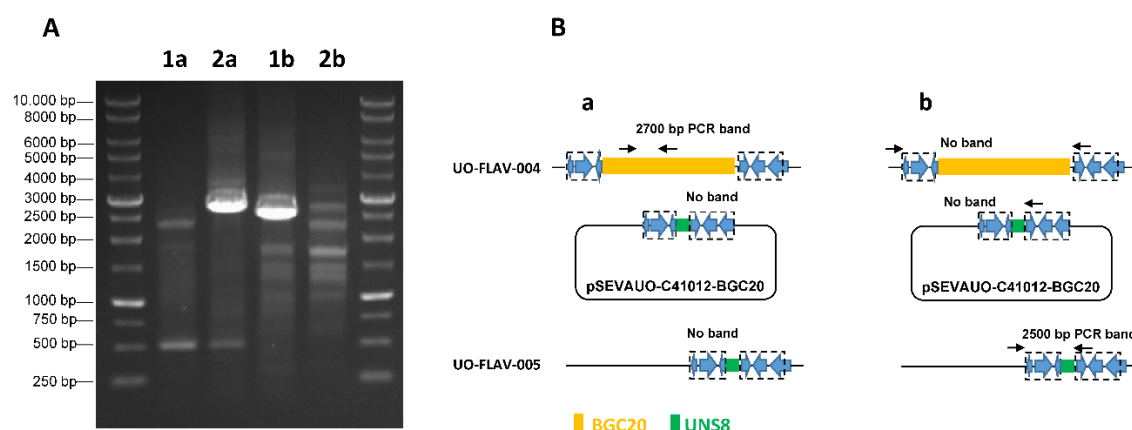

Figure S1. Generation of the *S. albidoflavus* UO-FLAV-005 strain. A) Agarose gel for PCR verification of the BGC20 deletion event, using the primers “JSD UP-checkingOK-BGC20” and “JSD RP-checkingWT-BGC20” on the mutant strain *S. albidoflavus* UO-FLAV-005 (lane 1a) and in the parental strain *S. albidoflavus* UO-FLAV-004 (lane 2a), and also using the primers “JSD UP-checkingOK-BGC20” and “JSD RP-checking-BGC20” on the mutant strain *S. albidoflavus* UO-FLAV-005 (lane 1b) and on the parental strain *S. albidoflavus* UO-FLAV-004 (lane 2b). B) Graphical representation of the expected PCR amplifications shown in the agarose gel picture: (a) expected PCR results on the parental (*S. albidoflavus* UO-FLAV-004) and mutant (*S. albidoflavus* UO-FLAV-005) strains using

the primers “JSD UP-checkingOK-BGC20” and “JSD RP-checkingWT-BGC20” (2700 bp); (b) expected PCR results with primers “JSD UP-checkingOK-BGC20” and “JSD RP-checking-BGC20” (2500 bp). The black arrows indicate the primers and are shown where annealing is possible for one or both of them. UNS8: non-coding DNA region of 40 bp in the pSEVAUO-C41012-BGC20 between the homologous arms. PCR conditions using Terra™ PCR Direct Polymerase: 1 cycle of 98 °C (2 min), and 35 cycles of 98 °C (10 sec) + 68 °C (3 min).

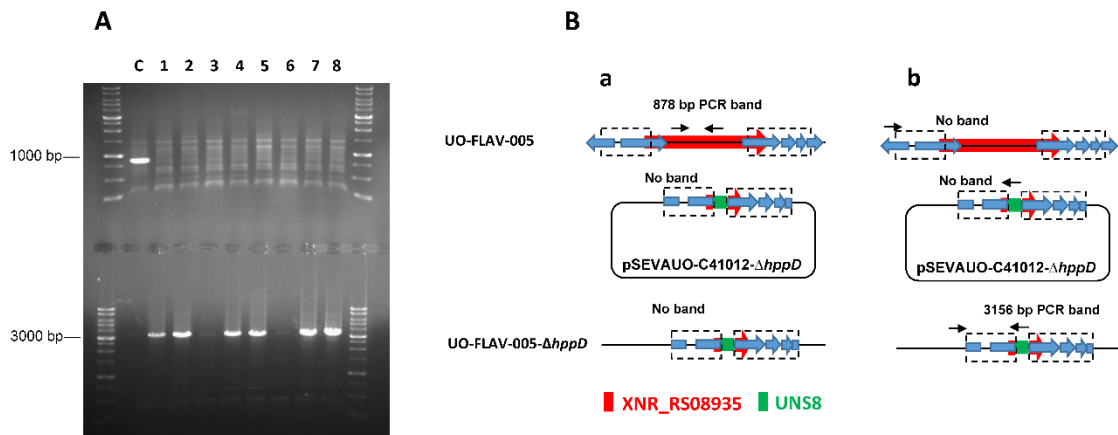

Figure S2: Generation of the *S. albidoflavus* UO-FLAV-005- $\Delta$ hppD strain. A) Agarose gel for PCR verification of the hppD knock-out event. Lanes on top are PCR results using the primers “Deletion hppD fw” and “Deletion hppD rev” on the mutant strain *S. albidoflavus* UO-FLAV-005- $\Delta$ hppD (lanes 1-8) and in the parental strain *S. albidoflavus* UO-FLAV-005 (lane C). Lanes below are PCR results using the primers “Recombination hppD FW” and “UNS8 REV” on the mutant strain *S. albidoflavus* UO-FLAV-005- $\Delta$ hppD (lanes 1-8) and on the parental strain *S. albidoflavus* UO-FLAV-005 (lane C). All the clones checked are correct. B) Graphical representation of the expected PCR amplifications shown in the agarose gel picture: (a) expected PCR results on the parental (*S. albidoflavus* UO-FLAV-005) and mutant (*S. albidoflavus* UO-FLAV-005- $\Delta$ hppD) strains using the primers “Deletion hppD fw” and “Deletion hppD rev” (878 bp); (b) expected PCR results with primers “Recombination hppD FW” and “UNS8 REV” (3156 bp). The black arrows indicate the primers and are shown where annealing is possible for one or both of them. UNS8: non-coding DNA region of 40 bp in the pSEVAUO-C41012- $\Delta$ hppD between the homologous arms. PCR conditions using Terra™ PCR Direct Polymerase: 1 cycle of 98 °C (2 min), and 35 cycles of 98 °C (10 sec) + 68 °C (3.5 min).

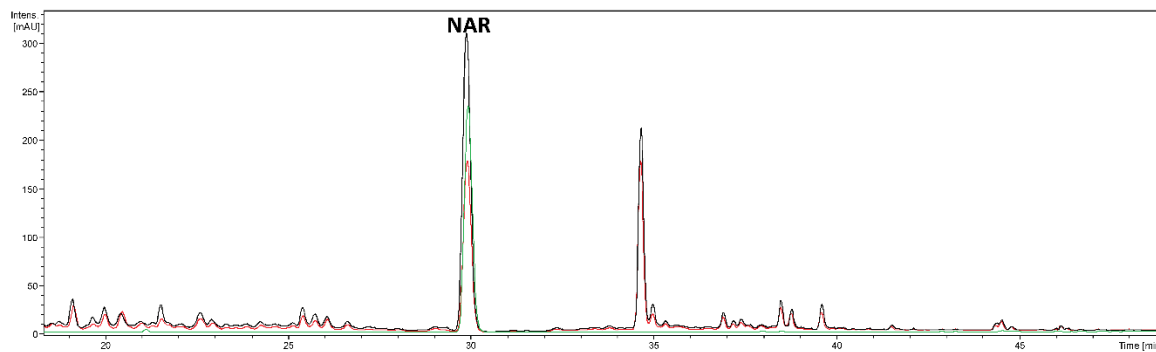

Figure S3: HPLC-DAD chromatograms showing the biosynthesis of naringenin in the strains *S. albidoflavus* UO-FLAV-005-NAR (red) and *S. albidoflavus* UO-FLAV-005- $\Delta$ hppD-NAR (black). Naringenin (NAR) pure standard in green.

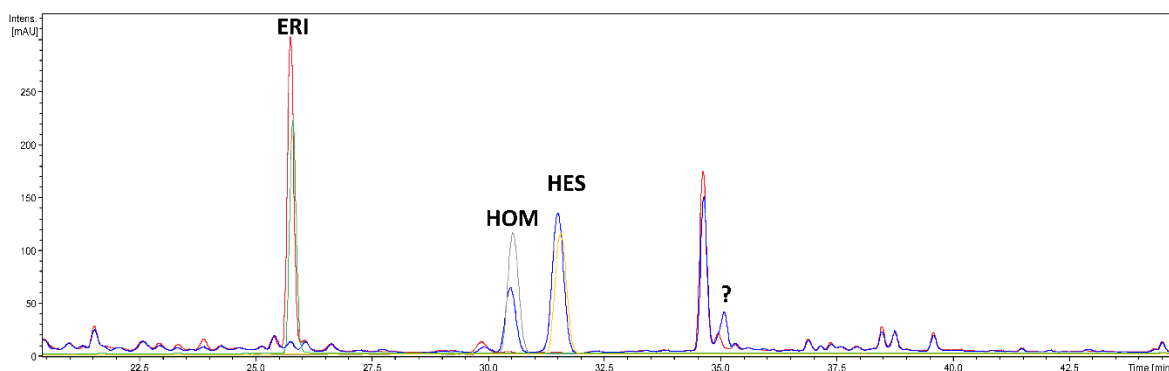

Figure S4: HPLC-DAD chromatograms of *S. albidoflavus* UO-FLAV-005- $\Delta$ hppD-ERI (red) and *S. albidoflavus* UO-FLAV-005- $\Delta$ hppD-HES/HOM (blue). Eriodictyol (ERI) pure standard in green; Homoeriodictyol (HOM) pure standard in gray; Hesperetin (HES) pure standard in orange; Tentative dimethylated eriodictyol (?).

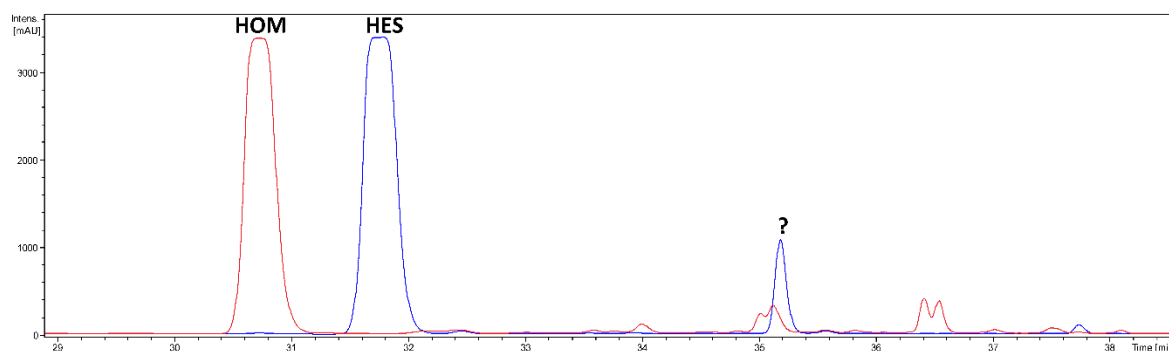

Figure S5: HPLC-DAD chromatograms of *S. albidoflavus* UO-FLAV-005 fed with homoeriodictyol (red) and hesperetin (blue). Homoeriodictyol (HOM); Hesperetin (HES); Tentative dimethyl eriodictyol (?).

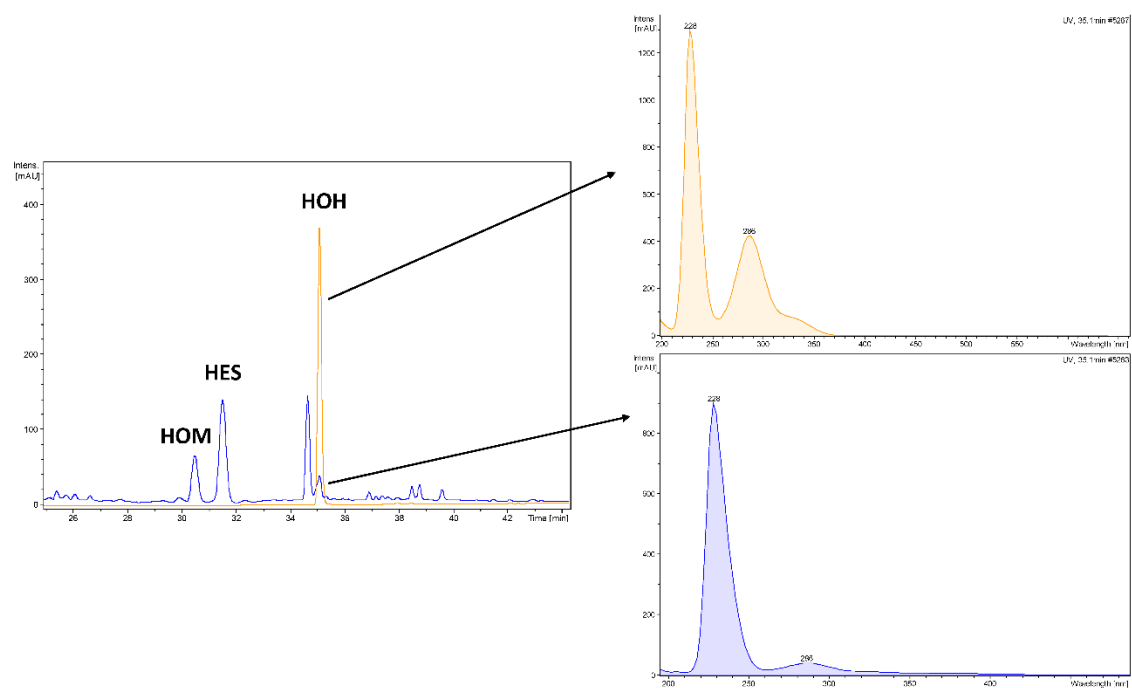

Figure S6: HPLC-DAD chromatograms *S. albidoflavus* UO-FLAV-005- $\Delta hppD$ -HES/HOM (blue) and a pure standard of Homohesperetin (orange). Black arrows indicate the absorption spectra of the tentative dimethyl eriodictyol (blue) and Homohesperetin (orange). Homoeriodictyol (HOM); Hesperetin (HES); Homohesperetin (HOH).

Table S1: List of differentially expressed genes. Abbreviations: WT.Tx: wild-type cultures of *S. albidiflavus* with added L-Tyr, WT-x: control cultures of the wild-type strain.

| FeatureID  | Regulation | GeneName    | log2FC      | DE         | p-value     | p-adjusted  | RC Product                                                       | WT.T1 | WT.T2 | WT.T3 | WT.S | WT.3 | WT.S  |
|------------|------------|-------------|-------------|------------|-------------|-------------|------------------------------------------------------------------|-------|-------|-------|------|------|-------|
| ENR_023888 | No         | 2768.86614  | -1.3618868  | 0.1789001  | 0.1238921   | 0.1820222   | 0.886127122 WUS family transcriptional regulator                 | 1261  | 1811  | 2318  | 4074 | 8482 | 4464  |
| ENR_023788 | Down       | 14184.821   | 0.17137628  | 0.60897728 | 0.48201818  | 0.002878897 | 0.112848227 Paq/Tss family 10 terminal domain-containing protein | 411   | 792   | 880   | 847  | 8028 | 18028 |
| ENR_023828 | Down       | 10863.87764 | -0.18171477 | 0.17132087 | 0.01088028  | 0.2886868   | 0.148764878 M23 family nucleoside pyrophosphatase                | 187   | 461   | 600   | 1388 | 1068 | 1882  |
| ENR_023820 | No         | 189.717842  | 1.88808928  | 0.42277908 | 0.003817168 | 0.0628008   | 0.138127588 R26 family oxidoreductase                            | 288   | 458   | 484   | 117  | 80   | 128   |
| ENR_023830 | No         | 232.477748  | -0.68613005 | 0.93820048 | 0.0140348   | 0.2881894   | 0.812788412 hypothetical protein                                 | 189   | 183   | 177   | 704  | 428  | 471   |
| ENR_023768 | No         | 2848.90358  | -0.20216888 | 0.28428772 | 0.01218864  | 0.3878584   | 0.028287809 multi-subunit ABC transporter                        | 868   | 1288  | 2148  | 4851 | 9788 | 4084  |
| ENR_023832 | No         | 2114.17582  | -0.13418178 | 0.93748484 | 0.002188828 | 0.288488872 | 0.388488811 cytochrome P450                                      | 434   | 782   | 1184  | 1078 | 3840 | 8711  |
| ENR_023822 | Up         | 1346.76782  | 2.438178    | 0.21817888 | 2.38782810  | 0.8488288   | 0.382114384 type I polyketide synthase                           | 4752  | 4784  | 4911  | 884  | 424  | 1004  |
| ENR_023828 | Up         | 374.288828  | 1.47787874  | 0.1238841  | 0.287888    | 0.00208888  | 0.87888884 type I polyketide synthase                            | 788   | 861   | 878   | 284  | 171  | 220   |
| ENR_023830 | No         | 182.2138    | -0.71888811 | 0.28428772 | 0.00918778  | 0.194711    | 0.288282878 carboxylate ABC transporter permease                 | 428   | 388   | 448   | 1852 | 1821 | 1004  |
| ENR_023888 | Down       | 1485.04888  | -0.2778888  | 0.3887888  | 0.001388388 | 0.04477728  | 0.381888848 sugar ABC transporter permease                       | 738   | 713   | 1028  | 2722 | 2752 | 2884  |
| ENR_023828 | No         | 880.00888   | -0.18787878 | 0.8413208  | 0.0848888   | 0.8427084   | 0.028177888 hypothetical protein                                 | 181   | 148   | 188   | 484  | 888  | 1004  |
| ENR_023788 | No         | 180.08811   | 1.78887874  | 0.188787   | 0.00888428  | 0.188787    | 0.412888282 DUF713 family protein                                | 1788  | 488   | 841   | 124  | 88   | 128   |
| ENR_023828 | Down       | 278.0882    | -0.6881278  | 0.93820048 | 0.0140348   | 0.2881894   | 0.812788412 hypothetical protein                                 | 189   | 183   | 177   | 704  | 428  | 471   |
| ENR_023820 | No         | 188.48888   | -0.2784882  | 0.93820048 | 0.0140348   | 0.2881894   | 0.812788412 hypothetical protein                                 | 189   | 183   | 177   | 704  | 428  | 471   |
| ENR_023888 | No         | 4088.0218   | -0.88888204 | 0.818281   | 0.0188881   | 0.088828    | 0.028877888 acid shock protein                                   | 1878  | 2488  | 2721  | 7388 | 8888 | 7182  |
| ENR_023820 | Up         | 887.778182  | 1.8813218   | 0.127882   | 0.0088888   | 0.2248828   | 0.48288884 hypothetical repeat-containing protein                | 1078  | 1448  | 1888  | 422  | 818  | 818   |
| ENR_023828 | No         | 278.0882    | -0.6881278  | 0.93820048 | 0.0140348   | 0.2881894   | 0.812788412 hypothetical protein                                 | 189   | 183   | 177   | 704  | 428  | 471   |
| ENR_023888 | No         | 708.18882   | 1.78887874  | 0.188787   | 0.00888428  | 0.188787    | 0.412888282 DUF713 family protein                                | 1788  | 488   | 841   | 124  | 88   | 128   |
| ENR_023820 | No         | 182.2138    | -0.71888811 | 0.28428772 | 0.00918778  | 0.194711    | 0.288282878 carboxylate ABC transporter permease                 | 428   | 388   | 448   | 1852 | 1821 | 1004  |
| ENR_023788 | No         | 278.0882    | -0.6881278  | 0.93820048 | 0.0140348   | 0.2881894   | 0.812788412 hypothetical protein                                 | 189   | 183   | 177   | 704  | 428  | 471   |
| ENR_023820 | Up         | 1346.76782  | 2.438178    | 0.21817888 | 2.38782810  | 0.8488288   | 0.382114384 type I polyketide synthase                           | 4752  | 4784  | 4911  | 884  | 424  | 1004  |
| ENR_023828 | No         | 180.08811   | 1.78887874  | 0.188787   | 0.00888428  | 0.188787    | 0.412888282 DUF713 family protein                                | 1788  | 488   | 841   | 124  | 88   | 128   |
| ENR_023820 | No         | 182.2138    | -0.71888811 | 0.28428772 | 0.00918778  | 0.194711    | 0.288282878 carboxylate ABC transporter permease                 | 428   | 388   | 448   | 1852 | 1821 | 1004  |
| ENR_023888 | No         | 4088.0218   | -0.88888204 | 0.818281   | 0.0188881   | 0.088828    | 0.028877888 acid shock protein                                   | 1878  | 2488  | 2721  | 7388 | 8888 | 7182  |
| ENR_023820 | Up         | 887.778182  | 1.8813218   | 0.127882   | 0.0088888   | 0.2248828   | 0.48288884 hypothetical repeat-containing protein                | 1078  | 1448  | 1888  | 422  | 818  | 818   |
| ENR_023828 | No         | 278.0882    | -0.6881278  | 0.93820048 | 0.0140348   | 0.2881894   | 0.812788412 hypothetical protein                                 | 189   | 183   | 177   | 704  | 428  | 471   |
| ENR_023820 | No         | 188.48888   | -0.2784882  | 0.93820048 | 0.0140348   | 0.2881894   | 0.812788412 hypothetical protein                                 | 189   | 183   | 177   | 704  | 428  | 471   |
| ENR_023888 | No         | 708.18882   | 1.78887874  | 0.188787   | 0.00888428  | 0.188787    | 0.412888282 DUF713 family protein                                | 1788  | 488   | 841   | 124  | 88   | 128   |
| ENR_023820 | No         | 182.2138    | -0.71888811 | 0.28428772 | 0.00918778  | 0.194711    | 0.288282878 carboxylate ABC transporter permease                 | 428   | 388   | 448   | 1852 | 1821 | 1004  |
| ENR_023788 | No         | 278.0882    | -0.6881278  | 0.93820048 | 0.0140348   | 0.2881894   | 0.812788412 hypothetical protein                                 | 189   | 183   | 177   | 704  | 428  | 471   |
| ENR_023820 | Up         | 1346.76782  | 2.438178    | 0.21817888 | 2.38782810  | 0.8488288   | 0.382114384 type I polyketide synthase                           | 4752  | 4784  | 4911  | 884  | 424  | 1004  |
| ENR_023828 | No         | 180.08811   | 1.78887874  | 0.188787   | 0.00888428  | 0.188787    | 0.412888282 DUF713 family protein                                | 1788  | 488   | 841   | 124  | 88   | 128   |
| ENR_023820 | No         | 182.2138    | -0.71888811 | 0.28428772 | 0.00918778  | 0.194711    | 0.288282878 carboxylate ABC transporter permease                 | 428   | 388   | 448   | 1852 | 1821 | 1004  |
| ENR_023888 | No         | 4088.0218   | -0.88888204 | 0.818281   | 0.0188881   | 0.088828    | 0.028877888 acid shock protein                                   | 1878  | 2488  | 2721  | 7388 | 8888 | 7182  |
| ENR_023820 | Up         | 887.778182  | 1.8813218   | 0.127882   | 0.0088888   | 0.2248828   | 0.48288884 hypothetical repeat-containing protein                | 1078  | 1448  | 1888  | 422  | 818  | 818   |
| ENR_023828 | No         | 278.0882    | -0.6881278  | 0.93820048 | 0.0140348   | 0.2881894   | 0.812788412 hypothetical protein                                 | 189   | 183   | 177   | 704  | 428  | 471   |
| ENR_023820 | No         | 188.48888   | -0.2784882  | 0.93820048 | 0.0140348   | 0.2881894   | 0.812788412 hypothetical protein                                 | 189   | 183   | 177   | 704  | 428  | 471   |
| ENR_023888 | No         | 708.18882   | 1.78887874  | 0.188787   | 0.00888428  | 0.188787    | 0.412888282 DUF713 family protein                                | 1788  | 488   | 841   | 124  | 88   | 128   |
| ENR_023820 | No         | 182.2138    | -0.71888811 | 0.28428772 | 0.00918778  | 0.194711    | 0.288282878 carboxylate ABC transporter permease                 | 428   | 388   | 448   | 1852 | 1821 | 1004  |
| ENR_023788 | No         | 278.0882    | -0.6881278  | 0.93820048 | 0.0140348   | 0.2881894   | 0.812788412 hypothetical protein                                 | 189   | 183   | 177   | 704  | 428  | 471   |
| ENR_023820 | Up         | 1346.76782  | 2.438178    | 0.21817888 | 2.38782810  | 0.8488288   | 0.382114384 type I polyketide synthase                           | 4752  | 4784  | 4911  | 884  | 424  | 1004  |
| ENR_023828 | No         | 180.08811   | 1.78887874  | 0.188787   | 0.00888428  | 0.188787    | 0.412888282 DUF713 family protein                                | 1788  | 488   | 841   | 124  | 88   | 128   |
| ENR_023820 | No         | 182.2138    | -0.71888811 | 0.28428772 | 0.00918778  | 0.194711    | 0.288282878 carboxylate ABC transporter permease                 | 428   | 388   | 448   | 1852 | 1821 | 1004  |
| ENR_023888 | No         | 4088.0218   | -0.88888204 | 0.818281   | 0.0188881   | 0.088828    | 0.028877888 acid shock protein                                   | 1878  | 2488  | 2721  | 7388 | 8888 | 7182  |
| ENR_023820 | Up         | 887.778182  | 1.8813218   | 0.127882   | 0.0088888   | 0.2248828   | 0.48288884 hypothetical repeat-containing protein                | 1078  | 1448  | 1888  | 422  | 818  | 818   |
| ENR_023828 | No         | 278.0882    | -0.6881278  | 0.93820048 | 0.0140348   | 0.2881894   | 0.812788412 hypothetical protein                                 | 189   | 183   | 177   | 704  | 428  | 471   |
| ENR_023820 | No         | 188.48888   | -0.2784882  | 0.93820048 | 0.0140348   | 0.2881894   | 0.812788412 hypothetical protein                                 | 189   | 183   | 177   | 704  | 428  | 471   |
| ENR_023888 | No         | 708.18882   | 1.78887874  | 0.188787   | 0.00888428  | 0.188787    | 0.412888282 DUF713 family protein                                | 1788  | 488   | 841   | 124  | 88   | 128   |
| ENR_023820 | No         | 182.2138    | -0.71888811 | 0.28428772 | 0.00918778  | 0.194711    | 0.288282878 carboxylate ABC transporter permease                 | 428   | 388   | 448   | 1852 | 1821 | 1004  |
| ENR_023788 | No         | 278.0882    | -0.6881278  | 0.93820048 | 0.0140348   | 0.2881894   | 0.812788412 hypothetical protein                                 | 189   | 183   | 177   | 704  | 428  | 471   |
| ENR_023820 | Up         | 1346.76782  | 2.438178    | 0.21817888 | 2.38782810  | 0.8488288   | 0.382114384 type I polyketide synthase                           | 4752  | 4784  | 4911  | 884  | 424  | 1004  |
| ENR_023828 | No         | 180.08811   | 1.78887874  | 0.188787   | 0.00888428  | 0.188787    | 0.412888282 DUF713 family protein                                | 1788  | 488   | 841   | 124  | 88   | 128   |
| ENR_023820 | No         | 182.2138    | -0.71888811 | 0.28428772 | 0.00918778  | 0.194711    | 0.288282878 carboxylate ABC transporter permease                 | 428   | 388   | 448   | 1852 | 1821 | 1004  |
| ENR_023888 | No         | 4088.0218   | -0.88888204 | 0.818281   | 0.0188881   | 0.088828    | 0.028877888 acid shock protein                                   | 1878  | 2488  | 2721  | 7388 | 8888 | 7182  |
| ENR_023820 | Up         | 887.778182  | 1.8813218   | 0.127882   | 0.0088888   | 0.2248828   | 0.48288884 hypothetical repeat-containing protein                | 1078  | 1448  | 1888  | 422  | 818  | 818   |
| ENR_023828 | No         | 278.0882    | -0.6881278  | 0.93820048 | 0.0140348   | 0.2881894   | 0.812788412 hypothetical protein                                 | 189   | 183   | 177   | 704  | 428  | 471   |
| ENR_023820 | No         | 188.48888   | -0.2784882  | 0.93820048 | 0.0140348   | 0.2881894   | 0.812788412 hypothetical protein                                 | 189   | 183   | 177   | 704  | 428  | 471   |
| ENR_023888 | No         | 708.18882   | 1.78887874  | 0.188787   | 0.00888428  | 0.188787    | 0.412888282 DUF713 family protein                                | 1788  | 488   | 841   | 124  | 88   | 128   |
| ENR_023820 | No         | 182.2138    | -0.71888811 | 0.28428772 | 0.00918778  | 0.194711    | 0.288282878 carboxylate ABC transporter permease                 | 428   | 388   | 448   | 1852 | 1821 | 1004  |
| ENR_023788 | No         | 278.0882    | -0.6881278  | 0.93820048 | 0.0140348   | 0.2881894   | 0.812788412 hypothetical protein                                 | 189   | 183   | 177   | 704  | 428  | 471   |
| ENR_023820 | Up         | 1346.76782  | 2.438178    | 0.21817888 | 2.38782810  | 0.8488288   | 0.382114384 type I polyketide synthase                           | 4752  | 4784  | 4911  | 884  | 424  | 1004  |
| ENR_023828 | No         | 180.08811   | 1.78887874  | 0.188787   | 0.00888428  | 0.188787    | 0.412888282 DUF713 family protein                                | 1788  | 488   | 841   | 124  | 88   | 128   |
| ENR_023820 | No         | 182.2138    | -0.71888811 | 0.28428772 | 0.00918778  | 0.194711    | 0.288282878 carboxylate ABC transporter permease                 | 428   | 388   | 448   | 1852 | 1821 | 1004  |
| ENR_023888 | No         | 4088.0218   | -0.88888204 | 0.818281   | 0.0188881   | 0.088828    | 0.028877888 acid shock protein                                   | 1878  | 2488  | 2721  | 7388 | 8888 | 7182  |
| ENR_023820 | Up         | 887.778182  | 1.8813218   | 0.127882   | 0.0088888   | 0.2248828   | 0.48288884 hypothetical repeat-containing protein                | 1078  | 1448  | 1888  | 422  | 818  | 818   |
| ENR_023828 | No         | 278.0882    | -0.6881278  | 0.93820048 | 0.0140348   | 0.2881894   | 0.812788412 hypothetical protein                                 | 189   | 183   | 177   | 704  | 428  | 471   |
| ENR_023820 | No         | 188.48888   | -0.2784882  | 0.93820048 | 0.0140348   | 0.2881894   | 0.812788412 hypothetical protein                                 | 189   | 183   | 177   | 704  | 428  | 471   |
| ENR_023888 | No         | 708.18882   | 1.78887874  | 0.188787   | 0.00888428  | 0.188787    | 0.412888282 DUF713 family protein                                | 1788  | 488   | 841   | 124  | 88   | 128   |
| ENR_023820 | No         | 182.2138    | -0.71888811 | 0.28428772 | 0.00918778  | 0.194711    | 0.288282878 carboxylate ABC transporter permease                 | 428   | 388   | 448   | 1852 | 1821 | 1004  |
| ENR_023788 | No         | 278.0882    | -0.6881278  | 0.93820048 | 0.0140348   | 0.2881894   | 0.812788412 hypothetical protein                                 | 189   | 183   | 177   | 704  | 428  | 471   |
| ENR_023820 | Up         | 1346.76782  | 2.438178    | 0.21817888 | 2.38782810  | 0.8488288   | 0.382114384 type I polyketide synthase                           | 4752  | 4784  | 4911  | 884  | 424  | 1004  |
| ENR_023828 | No         | 180.08811   | 1.78887874  | 0.188787   | 0.00888428  | 0.188787    | 0.412888282 DUF713 family protein                                | 1788  |       |       |      |      |       |

Table S2: Primers used in this study.

| Function                             | Name                             | Sequence 5' - 3'                                                   |
|--------------------------------------|----------------------------------|--------------------------------------------------------------------|
| Homology region A BGC20              | JSD-BGC20-up1                    | CAAGACGCTGGCTCTGACATTTCCGCTACTGA<br>ACTACTCGCTGGCGGACAGCAGGGGC     |
|                                      | JSD-BGC20-rp2                    | CCAGGTGGTTGATGGGTTGATTGCTTTGGTTG<br>AGACGAGGATCAGCGCGTTCACCGGC     |
| Homology region B BGC20              | JSD-BGC20-up3                    | CCTCGTCTCAACCAAAGCAATCAACCCATCA<br>ACCACCTGGTGCCGTGTTCCAGGCTCGTGCC |
|                                      | JSD-BGC20-rp4                    | TATGTGACCGTAGAGTATTCTTAGGTGGCAGC<br>GAACGAGACGGTCGAGGGGAGCGTCGC    |
| Recombination checking BGC20         | JSD RP-checking-BGC20            | TTGGAGTAGAGCCGTTTCGAT                                              |
|                                      | JSD UP-checkingOK-BGC20          | GGTCACCGGTGTCGATAGTC                                               |
| Deletion checking BGC20              | JSD UP-checkingOKBGC20           | GGTCACCGGTGTCGATAGTC                                               |
|                                      | JSD RP-checkingWTBGC20           | GTCTACACCACGGCGTTCAT                                               |
| Protospacer BGC20                    | JSD-BGC20-PS-up                  | ACGCCGCGCACCAGGTTGCGGGGG                                           |
|                                      | JSD-BGC20-PS-rp                  | AAACCCCCCGCAACCTGGTGCGCG                                           |
| Homology región A $\Delta hppD$      | Primer SBF-UNS7-hppD-regionA-fw  | CAAGACGCTGGCTCTGACATTTCCGCTACTGA<br>ACTACTCGGAGCCACTCCTTCTTCAGGA   |
|                                      | Primer SBF-UNS8-hppD-regionA-rev | CCAGGTGGTTGATGGGTTGATTGCTTTGGTTG<br>AGACGAGGACTTCAAGGCCCTCTTCGAG   |
| Homology región B $\Delta hppD$      | Primer SBF-UNS8-hppD-regionB-fw  | CCTCGTCTCAACCAAAGCAATCAACCCATCA<br>ACCACCTGGGAGTAGGCGACGAGCTTCAT   |
|                                      | Primer SBF-UNS6-hppD-regionB-rev | TATGTGACCGTAGAGTATTCTTAGGTGGCAGC<br>GAACGAGTGCGAGAGGTTCTTGATGC     |
| Recombination checking $\Delta hppD$ | Recombination hppD FW            | CGCTGCACCTCGACGCCG                                                 |
|                                      | UNS8 REV                         | CCAGGTGGTTGATGGGTTG                                                |
| Deletion checking $\Delta hppD$      | Deletion hppD fw                 | GTCGGCTTGTCCTGGACCG                                                |
|                                      | Deletion hppD rev                | GGACCGGAGAACGGCAGC                                                 |
| Protospacer $\Delta hppD$            | Protospacer XNR_1801 fw          | ACGCGGCCACGTGGCTCTCCAGGA                                           |
|                                      | Protospacer XNR_1801 rev         | AAACTCCTGGAGAGCCACGTGGCC                                           |
| pSEVA88c1 amplification              | Vector FW UNS6                   | CTCGTTCGCTGCCACCTAAGAATACTCTACGG<br>TCACATACAAGCTTGCGGCCGCGTCG     |
|                                      | Vector REV UNS7                  | CGAGTAGTTCAGTAGCGGAAATGTCAGAGCC<br>AGCGTCTTGCCTAGGCGGCCTCCTGTG     |
